# Supplementary material for: Microsatellites in the Genome of the Edible Mushroom,Volvariella volvacea
Source: Hindawi journal article supplement (doi:10.1155/2014/281912), 2014-01-01
Supplement: f1 [file 281912.f1.pdf]

**Table S1**

List of analyzed edible fungal genomes their web sites.

| Organism                                                | Public web site                                                                                                                                                                           |
|---------------------------------------------------------|-------------------------------------------------------------------------------------------------------------------------------------------------------------------------------------------|
| <i>Volvariella volvacea</i> V23                         | <a href="http://genome.jgi-psf.org/pages/dynamicOrganismDownload.jsf?organism=Volvo1">http://genome.jgi-psf.org/pages/dynamicOrganismDownload.jsf?organism=Volvo1</a>                     |
| <i>Coprinus cinereus</i>                                | <a href="http://www.broadinstitute.org/annotation/genome/coprinus_cinereus/MultiDownloads.html">http://www.broadinstitute.org/annotation/genome/coprinus_cinereus/MultiDownloads.html</a> |
| <i>Schizophyllum commune</i> H4-8 v2.0                  | <a href="http://genome.jgi-psf.org/Schco2/Schco2.download.html">http://genome.jgi-psf.org/Schco2/Schco2.download.html</a>                                                                 |
| <i>Agaricus bisporus</i> var <i>bisporus</i> (H97) v2.0 | <a href="http://genome.jgi-psf.org/Agabi_varbisH97_2/Agabi_varbisH97_2.download.html">http://genome.jgi-psf.org/Agabi_varbisH97_2/Agabi_varbisH97_2.download.html</a>                     |
| <i>Pleurotus ostreatus</i> PC15 v2.0                    | <a href="http://genome.jgi-psf.org/PleosPC15_2/PleosPC15_2.download.html">http://genome.jgi-psf.org/PleosPC15_2/PleosPC15_2.download.html</a>                                             |

**Table S2**

Set of primers corresponding to the 100 microsatellite locus randomly selected from *V. volvacea* genome.

| Microsatellite | Primer sequence                                     | Position on <i>V. volvacea</i> genome |
|----------------|-----------------------------------------------------|---------------------------------------|
| (TGCTGA)5      | (F)ACGACGCGTATTTGTTTTCC<br>(R)GCAGTTTGACCCCACTCATT  | Scaffold1_431928-431957               |
| (ACGAAG)6      | (F)GAAAAGCGTGTGGTTGGATT<br>(R)TACTCGTCCTCGTCCTCGTT  | Scaffold1_612925-612960               |
| (TCC)8         | (F)ACTCCTCTGCAGCTTTCTCG<br>(R)GGTTTACGAGCTCTTGGCTG  | Scaffold1_1065146-1065169             |
| (GTG)6         | (F)AATGAAGCAACAGATTGGGG<br>(R)GGGTGTGACAGAACTGCCTT  | Scaffold1_1906218-1906235             |
| (GTT)6         | (F)GTCGAGGTTGATGTCGAGGT<br>(R)GGCCTAATTGTCTCGAGTGC  | Scaffold1_2488335-2488352             |
| (CTG)7         | (F)ATCCTTGTGCGGAAGTTGGTG<br>(R)GGAAAAGGAACGGAAGAAGG | Scaffold1_2687794-2687814             |
| (TGG)10        | (F)TGATGGTGTAGCAGTGGCAT<br>(R)CAGTCACAGTCTGGTGGTGC  | Scaffold1_3470394-3470423             |
| (TGCC)6        | (F)GGTCAGAGGCTTGTACTCGG<br>(R)TCTCTTTGCTCGAGCTCCTC  | Scaffold1_3819500-3819523             |
| (TCCGAG)5      | (F)CTTACTCTGCTTCGCTGCCT<br>(R)CGAAGACGAAGAGGATGAGG  | Scaffold2_348331-348360               |
| (T)15          | (F)TTCAGAAATCGAATGGAGGG<br>(R)TCCATCTCGTACGAAGACCC  | Scaffold2_629590-629604               |
| (A)38          | (F)GTCGCTGATTGTCCCAGAAT<br>(R)TATTGCGTAGTGTGCCAAA   | Scaffold2_1281474-1281511             |
| (CGTGTG)5      | (F)AACACTCGACCTGACCCAAC<br>(R)ATGCAAGGTCAAGGGACAAC  | Scaffold2_1299385-1299414             |
| (TTC)6         | (F)GTTTGCCTGCTTACCATCT<br>(R)CAATGGTACCCTGCTCGAAT   | Scaffold2_1901177-1901194             |
| (GTAGT)6       | (F)GCCCCACCATGGTAGTGTAG<br>(R)GGGAGAGGGAGGAAGAGAGA  | Scaffold2_2144371-2144400             |
| (AAAATA)5      | (F)GATTTCCAAAGGTGGCTCAA<br>(R)CTTTCTGCATGAGTTGTGGC  | Scaffold2_2549073-2549102             |
| (CCT)6         | (F)CTATCCCCACCAGCATCACT<br>(R)GTGCACCAGACCTGGTAAT   | Scaffold3_131152-131169               |
| (G)16          | (F)CGTCACCTGCGTTCACCTCTA<br>(R)AATTTCAAACACCCCAACCA | Scaffold3_631540-631555               |
| (GAG)13        | (F)AGTGCTGGACGACATGACTG<br>(R)AGGTGGTAGAGGCATGGTTG  | Scaffold3_1135265-1135303             |
| (AAGGAC)9      | (F)ACCAATGGGTCTAGGTGCTG<br>(R)TGCCTCTCATCAAGATCACG  | Scaffold3_1846823-1846876             |

|           |                                                    |                           |
|-----------|----------------------------------------------------|---------------------------|
| (GTC)7    | (F)AAGCTGTACGAGAAGGCGAC<br>(R)AGCGACATAAGCCAACATCC | Scaffold3_2393769-2393789 |
| (CCT)7    | (F)CCGAGCTCGCATACTCTTCT<br>(R)TAGAGGATTGTACGGGGCAG | Scaffold4_381002-381022   |
| (CGAAA)6  | (F)AAGCCCTACTCCAGCTCCTC<br>(R)CAACTATTTTCCGCCACCAT | Scaffold4_570255-570284   |
| (ACCG)5   | (F)GATCAGGCCACACAAAAGT<br>(R)ATCGAATAACTGGACCGACG  | Scaffold4_1042332-1042351 |
| (A)23     | (F)AATTGGGACATTTGAGGCAC<br>(R)CCTCGCTTCTCAAGGCAATA | Scaffold4_1688293-1688315 |
| (CACGA)5  | (F)GCTGATCACCGTTTTCGTTT<br>(R)GTTGATGGGCACGGTAGACT | Scaffold4_2262668-2262692 |
| (T)16     | (F)TTGAAGCAAATGTTTGCAG<br>(R)CTTGCATGATCCATCCTTT   | Scaffold5_268766-268781   |
| (GCC)6    | (F)GATCCATTAATGATGCGGCT<br>(R)CTTGCTTTGGCTCAAGGTTT | Scaffold5_982489-982506   |
| (AT)10    | (F)GATGAAGGTGTCGGTGGAAT<br>(R)TTGCGTTTTCGAACTGTCTG | Scaffold5_1073542-1073561 |
| (GAC)7    | (F)TCTACGCAGGAACACACTGG<br>(R)AAAATTGCTGCAAAGTGGCT | Scaffold5_1598143-1598163 |
| (A)26     | (F)TATACCATTGCTGGGGCATT<br>(R)AGTGGGACTCTGCAAGGCTA | Scaffold6_315238-315263   |
| (TGGT)6   | (F)GGAAGGAAGGGGTGAGAGTC<br>(R)ACGCTGGACCCCTAAAGAAT | Scaffold6_765056-765079   |
| (CTTCGA)5 | (F)GCGTGAATGCCGGTACTAAT<br>(R)CCGGTAGTTGGACTCCAGAA | Scaffold6_1336082-1336111 |
| (CAG)8    | (F)TCACCATCAGTCCAGATGC<br>(R)TCACGATTTACGCTCTCAC   | Scaffold7_119885-119908   |
| (GAC)8    | (F)ATATCCTTCGCGATGACCTG<br>(R)GTACTCCAGCACGGCATCTT | Scaffold7_320416-320439   |
| (T)61     | (F)CTTTCTGGGCTTTCGAGGTT<br>(R)GGCAAAGAAACGAAATGGAA | Scaffold7_962608-962668   |
| (GTG)9    | (F)TGCGATAGCACTCAAAGGTG<br>(R)GGCGTTCTATTCGTTCCAAA | Scaffold8_127150-127176   |
| (TACGAA)5 | (F)GAGCCGTCACATTTGACCT<br>(R)CCATTCCTGCTTCTTCTTCG  | Scaffold8_532402-532431   |
| (GTC)7    | (F)ATACGGGATACCGCTCTGTG<br>(R)ACCTCCGTTTTGGTTCACTG | Scaffold8_1157968-1157988 |
| (TTTCTT)5 | (F)TGGCACTTGTCACTCCTCTG<br>(R)AGACCTCTGAAGGTGGCTCA | Scaffold9_434842-434871   |
| (GGATAT)5 | (F)AGAGACCGATGGCAGAAAGA<br>(R)TCCTTCCATACTCCCTGC   | Scaffold9_814118-814147   |
| (TCTTCG)5 | (F)TTTCGGACAGGAGAGAGTCG                            | Scaffold10_162541-162570  |

|           |                            |                          |
|-----------|----------------------------|--------------------------|
|           | (R)TGGAGAAGAGGCAGGGTATG    |                          |
| (GCACAA)5 | (F)CGACTGCTCAAGTACACCCA    | Scaffold10_419127-419156 |
|           | (R)CTCCTCCTGTGCTTCGACTC    |                          |
| (TGCTGG)5 | (F)TATACGGCAGATTTGTTGCG    | Scaffold11_139461-139490 |
|           | (R)AGCAGCAGCAGGGAATGTAT    |                          |
| (CCGCAC)6 | (F)CGTCTACATCCACAACACCG    | Scaffold11_433434-433469 |
|           | (R)CTGTCGTCGTCTTCGTCTTG    |                          |
| (GGT)5    | (F)ATCGTCTACGGAGATCGGTG    | Scaffold11_608487-608501 |
|           | (R)CTACCACCACCAAGTCCACA    |                          |
| (GTGCTT)5 | (F)CCTTGTTCGGTTTGCTTGT     | Scaffold12_249930-249959 |
|           | (R)AAACTAGTCCCAAGGCGGAT    |                          |
| (GAGTGC)5 | (F)GAGCGATACTGCTGCTGTTG    | Scaffold12_784704-784733 |
|           | (R)CCAACTCAAACAGCTCCCAT    |                          |
| (CCGG)5   | (F)CTTGCCTTGGTCAAATCCAC    | Scaffold13_157743-157762 |
|           | (R)GCAGGCTAAAGGGTTCTTC     |                          |
| (TTTTC)5  | (F)TCTTGAGTGGCTATTGTCAGGA  | Scaffold13_687861-687885 |
|           | (R)AATGACGCCACCGAGAATAC    |                          |
| (GTG)7    | (F)TTTATGACTGGCTGTGGCTG    | Scaffold14_45258-45278   |
|           | (R)CGCAGGAGAGATGCATACAA    |                          |
| (GT)8     | (F)CAACCTCCTCTCCTCCCTC     | Scaffold14_562610-562625 |
|           | (R)TCCTGCCCACACAGTCATAA    |                          |
| (CAC)14   | (F)TTTGCATCTAATGACGCCAC    | Scaffold15_112434-112475 |
|           | (R)TTGTCTTTGAACATTCACATTGC |                          |
| (TTTTC)5  | (F)CCTGGGCTCTGTCACTGTCT    | Scaffold15_631004-631028 |
|           | (R)TAAGCAAGTCACGTGGTCCC    |                          |
| (GTTCTG)5 | (F)GGCTGATGACTTGGGTGACT    | Scaffold16_224142-224171 |
|           | (R)AGATGATGATGAGGATCGGC    |                          |
| (AAG)8    | (F)AGGAGGAGGAAGAGGCAAAG    | Scaffold16_721355-721378 |
|           | (R)ACAACGAGCGTCATAAGCCT    |                          |
| (TTTCTT)5 | (F)AAATACAGGCCTGGCAAGTG    | Scaffold17_318630-318659 |
|           | (R)CACATGGTCCTTGGTGCTTA    |                          |
| (T)20     | (F)CCACCACCTCACACTATCCC    | Scaffold17_615280-615299 |
|           | (R)GGGTGAGCAATCGGAAGATA    |                          |
| (A)22     | (F)GTCTCCCGATGTGTTCTGGT    | Scaffold18_145216-145237 |
|           | (R)CACGCGTCTGCAGGTATAGA    |                          |
| (ATT)8    | (F)ACCGCCCCTTTCTTAATGTT    | Scaffold18_541805-541828 |
|           | (R)ATCTGCAACAACGAACCACA    |                          |
| (T)33     | (F)TCTTAGGGTGCAGTCCGGATG   | Scaffold19_440824-440856 |
|           | (R)AGCACATGGGAACCAGAAAG    |                          |
| (ACC)9    | (F)CGTCTTCACCTTACCCCAA     | Scaffold19_646423-646449 |
|           | (R)GCTGTGATGGCAGACACACT    |                          |
| (A)38     | (F)CCAAGCAAGGAACAAGGAGA    | Scaffold20_2127-2164     |
|           | (R)GGCATTCTGCCAAAGAGTC     |                          |

|           |                          |                          |
|-----------|--------------------------|--------------------------|
| (TCG)7    | (F)CTGTCCACCACCTCAATCG   | Scaffold20_605184-605204 |
|           | (R)ACGTCTCATTCTTCACGGG   |                          |
| (T)26     | (F)AAGGAAACATGCCACAAAA   | Scaffold21_20097-20122   |
|           | (R)TGCCTATGTATTCTTGCGACC |                          |
| (TCG)6    | (F)CAGGAACAGCCATCTTCTC   | Scaffold21_169819-169836 |
|           | (R)GTATGTGCATCTCGCTTGGGA |                          |
| (GAC)6    | (F)ACGGAGCAGGTCGAGAGATA  | Scaffold22_303125-303142 |
|           | (R)ATCAAACCAAAGAACAGCGG  |                          |
| (TGC)7    | (F)AGTTGTTGTCGTTGCTGACG  | Scaffold22_601066-601086 |
|           | (R)AAACCAGAACCTGCAACACC  |                          |
| (GCA)6    | (F)ATGTGGCTAACTCCTGGGTG  | Scaffold23_499139-499156 |
|           | (R)TGACGAGTAGCTGGTGATGC  |                          |
| (T)21     | (F)ATGTTGTCGTGTCGTGTCGT  | Scaffold23_556485-556505 |
|           | (R)TTGATACTGCCTACCCCAGC  |                          |
| (ACG)8    | (F)GTGGGGATAGAACTGGGGTT  | Scaffold24_291636-291659 |
|           | (R)GGCTTCAATCCCTAGATGGC  |                          |
| (A)19     | (F)TGCTCTTACGGTCTCGGTCT  | Scaffold24_413622-413640 |
|           | (R)GGTTTGCGATTATGGTGGTC  |                          |
| (T)22     | (F)GCAGGAAGTCCTCCAAAGTG  | Scaffold25_80676-80697   |
|           | (R)GGGTTCCGGTATTCTTGAT   |                          |
| (GTCTT)5  | (F)CACGTTTTTCGTGTTTCGTG  | Scaffold25_335713-335737 |
|           | (R)AAACAGTCGAGACGGAGACG  |                          |
| (TCA)8    | (F)GCACTGCTTTCCTCATCTCC  | Scaffold26_284037-284060 |
|           | (R)GCCTATGATATGGAGCGAGC  |                          |
| (GTG)12   | (F)AGTGCGACGAGCCCTAGTTA  | Scaffold27_391371-391406 |
|           | (R)AGATTCTCCCTGACCCCATC  |                          |
| (ACCAAA)5 | (F)TCAGCGTCCATCACTCAAG   | Scaffold28_255725-255754 |
|           | (R)GCTCTGCAGGAGCAATAAC   |                          |
| (A)21     | (F)AGGCGAGGAAAAATCACCTT  | Scaffold29_291594-291614 |
|           | (R)GAACAGTCTGCTGGGGTGT   |                          |
| (AAAATA)7 | (F)GATTTCCAAAGGTGGCTCAA  | Scaffold30_2671-2712     |
|           | (R)ATGCACTGCTCAAGATGCAC  |                          |
| (ATCTAC)5 | (F)ATGTACAGGATTGCCGCTC   | Scaffold31_85372-85401   |
|           | (R)CCCGCTGAAATTAACGAAAA  |                          |
| (TGACC)7  | (F)CTTTCAGGAAGAGCCCAGC   | Scaffold32_217019-217053 |
|           | (R)TGAAGGGCTTGAAGGAGAAA  |                          |
| (CCTTT)5  | (F)GTGGCTGAGTGATTCCCAT   | Scaffold33_62403-62427   |
|           | (R)TTCAACAGTGCCCAGTTACG  |                          |
| (GTG)7    | (F)ATAACCGGAAGCAGAAGCAG  | Scaffold34_109975-109995 |
|           | (R)TTCTATCACAACAAGCCCC   |                          |
| (CCGAGT)5 | (F)ATATCTGGCTTCGACGGTTG  | Scaffold35_63354-63383   |
|           | (R)GATGTCCAAGTCCGAGTGGT  |                          |
| (TTTCTC)5 | (F)GCTGGCTGCATAAACGGTAT  | Scaffold36_143288-143317 |

|           |                            |                          |
|-----------|----------------------------|--------------------------|
|           | (R)AGGGAAATCGAAAGCGGTAT    |                          |
| (A)35     | (F)TCCAAGCGTCTATCAATCCC    | Scaffold37_171896-171930 |
|           | (R)CTTTTCGGCGACTTTTCTG     |                          |
| (AAT)8    | (F)TCAAGAGACAAAAAGTGAGCAAA | Scaffold38_108483-108506 |
|           | (R)TGTTGACTGCCACATTGAT     |                          |
| (GGATTG)5 | (F)GCGTCTTGGAGAAGCAAAAC    | Scaffold39_179253-179282 |
|           | (R)AATCGTGCACAAAGGAAACC    |                          |
| (G)16     | (F)TTATGACCCCTTCCAGATCG    | Scaffold40_34075-34090   |
|           | (R)GGTTGGAAGCAGACGAAGAG    |                          |
| (CGT)6    | (F)AAAAGCGCCCATTTGAACTT    | Scaffold41_115044-115061 |
|           | (R)CGTCAACTACCTCCCAACA     |                          |
| (CAC)6    | (F)GTCATCTGACCGCCTGGTAT    | Scaffold42_44443-44460   |
|           | (R)TTGGGTTTAAGCATTCTCGG    |                          |
| (AT)8     | (F)TGCTAGCCATGGCCTACTCT    | Scaffold43_117069-117084 |
|           | (R)AGTCAAGTTTAGGGCTGCCA    |                          |
| (TGA)7    | (F)TTCTTTTGGATTATGGCGGC    | Scaffold44_96228-96248   |
|           | (R)AACTCCACAACCACTACGCC    |                          |
| (ACC)6    | (F)GTTGGCACCCTACATCACG     | Scaffold45_109122-109139 |
|           | (R)GGTGGGCTATCAGCATCATT    |                          |
| (T)12     | (F)CCAAGGAACTTCACACCAAA    | Scaffold46_3720-3731     |
|           | (R)GTGACAGGGCAACAATTCAG    |                          |
| (CCCATA)5 | (F)GTGTTTCGTACTGGGCTTGGT   | Scaffold47_20934-20963   |
|           | (R)TCAGAATGGTATGCGGATCA    |                          |
| (T)10     | (F)TTGGTGCATCTCCATCAAAA    | Scaffold48_59215-59224   |
|           | (R)CAAACGTCAAATGAACGTGG    |                          |
| (TC)8     | (F)GGTTCTCTCTCCCTGCCTCT    | Scaffold49_3987-4002     |
|           | (R)TCAAGCTGACAAGGAACACG    |                          |
| (A)12     | (F)ATTTTTAAACGGAGGGGTGG    | Scaffold51_25191-25202   |
|           | (R)TAGCCCATGTGGACAAGACA    |                          |
| (A)20     | (F)TTTTAGGCTGCTCATGGCTT    | Scaffold56_3669-3688     |
|           | (R)AGCTTGAGGTTGATGGGATG    |                          |
| (TCG)5    | (F)GTGATTGCTACGGGCTTGAT    | Scaffold59_4798-4812     |
|           | (R)TCGATGGTGAAATGCGAATA    |                          |

**Table S3**

Microsatellites in the gene models with some specialized function in *V. voluacea*.

| Gene Product                                                               | Number of gene | Location       |
|----------------------------------------------------------------------------|----------------|----------------|
| CYP547B1                                                                   | 1              | Intron         |
| CYP5080B3b                                                                 | 1              | Intron         |
| CYP627A1                                                                   | 1              | Intron         |
| Ectomycorrhiza-upregulated GH16 glucan endo-1,3-beta-glucosidase precursor | 1              | Intron         |
| GH16 beta-1,3-glucan recognition protein                                   | 1              | CDS, Intron×2  |
| CAMK/CAMK1 protein kinase                                                  | 1              | CDS×4          |
| CAMK/CAMKL/Kin1 protein kinase                                             | 1              | CDS            |
| CAMK/CAMKL/Kin4 protein kinase                                             | 1              | CDS            |
| CMGC/SRPK protein kinase                                                   | 1              | CDS            |
| Hypothetical kinase                                                        | 1              | CDS            |
| Mps one binder kinase activator-like 4                                     | 1              | CDS            |
| CAMKK/ELM protein kinase                                                   | 1              | CDS            |
| HAL protein kinase                                                         | 1              | 5'UTR          |
| RAN protein kinase                                                         | 1              | Intron         |
| Phosphatidylinositol phosphate kinase PIPK5                                | 1              | 3'UTR          |
| STE/STE11/cdc15 protein kinase                                             | 1              | CDS            |
| Candidate aryl-alcohol dehydrogenase                                       | 1              | Intron         |
| Dehydrogenase E1 and transketolase domain-containing protein 1             | 1              | Intron, Intron |
| Dihydrolipoamide dehydrogenase                                             | 1              | Intron         |
| IMP dehydrogenase                                                          | 1              | CDS, Intron    |
| Pyruvate dehydrogenase                                                     | 1              | CDS            |
| Mitochondrial half-size ABC transporter                                    | 1              | CDS            |
| Multidrug resistance-associated ABC transporter                            | 1              | Intron         |
| OPT oligopeptide transporter                                               | 1              | Intron         |
| Pleiotropic drug resistance ABC transporter                                | 1              | Intron         |
| Sodium transport ATPase                                                    | 1              | Intron         |
| Urea transporter                                                           | 1              | 3'UTR          |
| Vacuolar amino acid transporter 4                                          | 1              | Intron×2       |
| ZIP-like iron-zinc transporter                                             | 1              | CDS            |
| 60S ribosomal protein L18-B                                                | 1              | 3'UTR          |
| ABC domain-containing protein                                              | 1              | CDS            |
| Adaptor protein                                                            | 1              | CDS            |
| Adenylate cyclase                                                          | 1              | CDS            |
| ADP-ribosylation factor                                                    | 1              | CDS            |
| Aminopeptidase                                                             | 1              | Intron         |
| AMP dependent CoA ligase                                                   | 1              | Intron         |

|                                                                                |   |             |
|--------------------------------------------------------------------------------|---|-------------|
| Ankyrin repeat protein                                                         | 1 | CDS         |
| Aspartic peptidase A1                                                          | 1 | 3'UTR       |
| ATP-dependent DNA helicase MER3                                                | 1 | Intron      |
| ATP citrate lyase isoform 2                                                    | 1 | 3'UTR       |
| Beta-tubulin 2 tubb2                                                           | 1 | Intron      |
| Beta-xylosidase                                                                | 1 | CDS         |
| C-4 methyl sterol oxidase                                                      | 1 | Intron      |
| Calnexin                                                                       | 1 | 3'UTR       |
| Carnitine/acyl carnitine carrier                                               | 1 | Intron      |
| CDC5                                                                           | 1 | Intron      |
| Clathrin-coated vesicle protein                                                | 1 | Intron      |
| Coiled-coil protein                                                            | 1 | CDS         |
| COP8                                                                           | 1 | CDS         |
| Copper-fist transcription factor                                               | 1 | 5'UTR       |
| Cytoplasmic protein                                                            | 2 | Intron×2    |
| Deoxyuridine 5'-triphosphate nucleotidohydrolase Dut                           | 1 | CDS         |
| Dienelactone hydrolase endo-1,3,1,4-beta-D-glucanase                           | 1 | Intron      |
| DNA helicase                                                                   | 1 | CDS         |
| DNA repair and recombination protein pif1                                      | 1 | Intron      |
| Endoplasmic reticulum protein                                                  | 1 | 3'UTR       |
| Epsin domain-containing protein                                                | 1 | CDS×2       |
| Exo-beta-1,3-glucanase                                                         | 1 | Intron      |
| Exosome component Rrp46                                                        | 1 | CDS         |
| Expansin family protein                                                        | 1 | CDS×2       |
| Expressed protein                                                              | 2 | CDS×2       |
| Extracellular triacylglycerol lipase precursor                                 | 1 | Intron      |
| Fructose-bisphosphate aldolase                                                 | 1 | CDS, Intron |
| Glutamate-rich WD repeat containing                                            | 1 | CDS         |
| Glycoside hydrolase family 10 and carbohydrate-binding module family 1 protein | 1 | Intron      |
| Glycoside hydrolase family 13 protein                                          | 1 | CDS         |
| Glycoside hydrolase family 15 protein                                          | 1 | Intron      |
| Glycoside hydrolase family 16 protein                                          | 1 | Intron×2    |
| Glycoside hydrolase family 18 protein                                          | 1 | CDS, Intron |
| Glycoside hydrolase family 35 protein                                          | 1 | Intron      |
| Glycoside hydrolase family 38 protein                                          | 1 | Intron      |
| Glycoside hydrolase family 92 protein                                          | 1 | Intron      |
| Glycosyltransferase family 2 protein                                           | 2 | CDS         |
| Glyoxal oxidase                                                                | 2 | 3'UTR       |
| H3                                                                             | 1 | Intron      |
| Heparinase II/III family protein                                               | 1 | Intron      |



|                                                                                             |   |               |
|---------------------------------------------------------------------------------------------|---|---------------|
| Heterotrimeric G protein alpha subunit B                                                    | 1 | Intron×2      |
| High-glucose-regulated protein 8                                                            | 1 | Intron        |
| Histone acetyltransferase mst2                                                              | 1 | CDS           |
| Histone deacetylase complex, catalytic component RPD3                                       | 1 | Intron        |
| HNWD1                                                                                       | 1 | Intron        |
| Iron sulfur assembly protein 1                                                              | 1 | Intron        |
| L-ascorbate oxidase                                                                         | 1 | 3'UTR         |
| Laccase 1                                                                                   | 1 | 3'UTR         |
| Laccase 3                                                                                   | 1 | 3'UTR         |
| Laccase 6                                                                                   | 1 | Intron        |
| Lipase                                                                                      | 1 | CDS×2         |
| Lipase 2                                                                                    | 1 | CDS×2, Intron |
| Long-chain-fatty-acid-CoA ligase                                                            | 1 | 3'UTR         |
| Metalloprotease                                                                             | 2 | Intron×2      |
| Metalloprotease ATP23                                                                       | 1 | 3'UTR         |
| MIP protein                                                                                 | 1 | CDS           |
| Mitochondrial chaperone bcs1                                                                | 1 | Intron        |
| Mitochondrial genome maintenance protein                                                    | 1 | CDS           |
| Modular protein with glycoside hydrolase family 13 and glycosyltransferase family 5 domains | 1 | Intron        |
| NADH-quinone oxidoreductase                                                                 | 1 | Intron        |
| Nonribosomal peptide synthetase 12                                                          | 1 | Intron        |
| NUC153 and WD40 repeat-containing nucleolar rRNA processing-related protein                 | 1 | Intron        |
| Nuclear condensin complex protein                                                           | 1 | Intron        |
| Nuclear protein                                                                             | 1 | 3'UTR         |
| Nucleolar protein                                                                           | 1 | CDS           |
| NWD2                                                                                        | 1 | Intron        |
| Peptidase 1                                                                                 | 1 | Intron        |
| Phosphatidylserine synthase 2                                                               | 1 | Intron        |
| Plant senescence-associated protein                                                         | 1 | CDS, Intron   |
| Pol-like protein Pol-2                                                                      | 1 | CDS           |
| Polyprotein                                                                                 | 1 | Intron        |
| Polysaccharide synthase Cps1p                                                               | 1 | 3'UTR         |
| Potassium/sodium efflux P-type ATPase                                                       | 1 | CDS×3, Intron |
| Pre-mRNA-processing ATP-dependent RNA helicase PRP5                                         | 1 | Intron        |
| Protoporphyrinogen oxidase                                                                  | 1 | Intron        |
| RAB-protein geranylgeranyltransferase                                                       | 1 | 3'UTR         |
| Ras protein                                                                                 | 1 | Intron        |
| Receptor expression-enhancing protein 4                                                     | 1 | CDS           |

|                                                           |   |               |
|-----------------------------------------------------------|---|---------------|
| Related actin-binding protein                             | 1 | CDS           |
| Retrotransposable element Tf2 155 kDa protein type 1-like | 1 | Intron        |
| Rho GTPase activating protein 22                          | 1 | CDS           |
| ROT1 protein                                              | 1 | 3'UTR         |
| RRM/R3H domain-containing protein                         | 1 | Intron        |
| Sec7 guanine nucleotide exchange factor                   | 1 | 3'UTR         |
| Serine palmitoyltransferase 2                             | 1 | CDS           |
| Serine protease inhibitor                                 | 1 | Intron        |
| SH3 domain-containing protein                             | 1 | 3'UTR, Intron |
| Siderophore biosynthesis regulatory protein               | 1 | Intron        |
| Sim15                                                     | 1 | Intron        |
| Sodium transport ATPase                                   | 1 | Intron        |
| Splicing factor SF1                                       | 1 | Intron        |
| STE-12 alpha                                              | 1 | Intron        |
| STE20                                                     | 1 | CDS           |
| Structural maintenance of chromosome protein 3            | 1 | Intron        |
| Tetraspanin Tsp2                                          | 2 | CDS           |
| Trehalase                                                 | 1 | Intron        |
| Ubiquitin-conjugating enzyme E2                           | 1 | CDS           |
| Ubiquitin C-terminal hydrolase                            | 1 | CDS           |
| Unnamed protein product                                   | 1 | 5'UTR         |
| Vacuolar DHA amino acid exporter                          | 1 | Intron        |
| Vacuolar membrane protein                                 | 1 | CDS           |
| Vacuole protein                                           | 1 | Intron        |
| XPG I-region protein                                      | 1 | CDS           |
| Xylanase                                                  | 1 | CDS           |
| ZYRO0D15356p                                              | 1 | CDS           |
